# Supplementary material
Source: PubMed Central journal article supplement (PMC3183650)
Supplement: Supp_Data.pdf [file Supp_Data.pdf]

## Supplementary Data

### Measures of Lipid Oxidation in Subarachnoid Hemorrhage and Traumatic Brain Injury

Aneurysmal subarachnoid hemorrhage (aSAH) and traumatic brain injury (TBI) patients and their respective controls were comparable (Table 1). However, aSAH patients were significantly older and had a greater prevalence of pre-existing hypertension and hypercholesterolemia than TBI patients ( $p < 0.05$ ). At admission, 12 of the 18 aSAH patients and all 18 of the TBI patients had a Glasgow Coma Score less than 8, indicating severe brain injury. Figure 2 shows isofurans (IsoFs),  $F_4$ -neuroprostanes ( $F_4$ -NeuroPs) and  $F_2$ -isoprostanes ( $F_2$ -IsoP) in the cerebrospinal fluid (CSF) of aSAH patients and their respective controls. IsoFs and  $F_4$ -NeuroPs were significantly increased in aSAH patients compared with controls and remained significant after adjusting for age and gender ( $p < 0.001$  and  $p < 0.001$ , respectively). Age- and gender-adjusted  $F_2$ -IsoP in CSF of aSAH patients were increased compared with controls ( $p = 0.011$ ).

Figure 3 shows CSF IsoFs,  $F_4$ -NeuroPs, and  $F_2$ -IsoP in TBI patients and their respective controls. IsoFs and  $F_4$ -NeuroPs in TBI patients were significantly increased compared with controls and remained significant after adjusting for age and gender ( $p < 0.001$  and  $p = 0.013$ , respectively). CSF  $F_2$ -IsoPs were not significantly different between the groups ( $p = 0.119$ ).

There were no significant differences between the aSAH and TBI patients in CSF IsoFs,  $F_2$ -IsoPs, or  $F_4$ -NeuroPs, after adjusting for age and gender.

### Do IsoFs, $F_4$ -NeuroPs, and $F_2$ -IsoP Have a Role in SAH and TBI?

This is the first study to comprehensively examine IsoFs,  $F_4$ -NeuroPs, and  $F_2$ -IsoPs in the CSF of patients with two catastrophic CNS injuries, namely, aSAH and TBI. In two case-controlled studies, we have shown a significant increase in IsoFs in aSAH and TBI patients compared with their respective age- and gender-matched controls. aSAH patients also had significantly increased levels of  $F_4$ -NeuroPs and  $F_2$ -IsoPs. Patients with TBI had significantly increased  $F_4$ -NeuroPs, but  $F_2$ -IsoPs were not different from their controls. These data show that CNS injury as a result of aSAH or TBI results in increased oxidative stress.

Increased concentrations of IsoFs in CSF after an aSAH or TBI are a new and important finding that may have clinical implications. IsoFs are influenced by oxygen tension (5, 6, 14) and altering oxygen concentration is an easily modifiable core component of clinical care in these patients. In contrast to  $F_2$ -IsoPs, production of IsoFs continues to rise with increasing ambient oxygen concentrations (5, 14). Previous studies have shown that increased CSF  $F_2$ -IsoPs (8) and  $F_4$ -NeuroPs (7) correlated with poor neurological outcome in aSAH patients. Whether increased IsoF levels associate with adverse outcomes and whether their concentration can be varied by altering inspired oxygen concentration remains to be determined.

We have shown for the first time that  $F_4$ -NeuroPs are significantly increased in the CSF of patients with TBI. Our data

also confirm a previous report that  $F_4$ -NeuroPs are significantly elevated in the CSF of aSAH patients (7). Since DHA is the major polyunsaturated fatty acid in the brain,  $F_4$ -NeuroP levels in CSF are likely a more specific indicator of possible neurological dysfunction than  $F_2$ -IsoPs. The  $F_2$ -IsoPs derive from oxidative damage to both neural and non-neural cells in the brain, including vascular cells and blood cells, since AA is present in all cells. In this regard, Hsieh *et al.* (7) showed that increased  $F_4$ -NeuroPs in CSF of patients with aSAH correlated with poor neurological outcome and suggested that  $F_4$ -NeuroPs might be more useful than  $F_2$ -IsoPs in CSF to predict outcome and interpret the role of hemorrhage in aSAH.

Our study has shown that CSF  $F_2$ -IsoPs in aSAH patients were significantly increased. These data accord with previous work showing that CSF  $F_2$ -IsoPs obtained within 24 h of surgery are significantly higher in aSAH patients compared with control patients (8).  $F_2$ -IsoPs were also significantly higher in aSAH patients who developed delayed onset cerebral vasospasm (1). Asaeda *et al.* (1) showed that  $F_2$ -IsoPs increased during the period of peak vasospasm and decreased gradually thereafter. The authors suggested that increased CSF  $F_2$ -IsoPs derived from the subarachnoid clot could be one of the causes of delayed cerebral vasospasm after aSAH. Since  $F_2$ -IsoPs promote vasoconstriction and platelet aggregation (2, 11, 14), they may be either mediators or markers of increased vasospasm risk. This might also explain their association with poor outcome (8). It remains to be seen whether therapeutic interventions (cerebral angioplasty) can alter the concentrations of these compounds.

Increased CSF  $F_2$ -IsoPs have been shown in adults (15, 17) and infants and children (3) after a TBI compared with controls. Varma *et al.* (16) showed that increased CSF  $F_2$ -IsoPs in infants and children with TBI correlated with neuron-specific enolase, a marker of neuronal damage. In contrast, we have shown that CSF  $F_2$ -IsoPs were not different between TBI and controls. Differences between previous studies and our findings may relate to methodological differences in the measurement of  $F_2$ -IsoPs and/or patient characteristics. The measurement of  $F_2$ -IsoPs using mass spectrometry as used by us is considered the gold standard, whereas previous studies (3, 17) have used an enzyme-linked immunoassay kit. We have shown poor agreement between  $F_2$ -IsoPs measured using an enzyme-linked immunoassay kit and mass spectrometry (13).

### Concluding Remarks and Future Directions

There is an urgent need to identify sensitive and specific markers that will enable the assessment of ongoing CNS injury in deeply comatose patients. CSF IsoFs and  $F_4$ -NeuroPs are consistently increased after a catastrophic CNS injury and their measurement may enhance the management of unconscious patients in neurological care. The increase in CSF IsoFs and  $F_4$ -NeuroPs in aSAH and TBI patients will require further investigation to establish their association with outcomes and whether they can indicate the efficacy of therapeutic interventions. In particular, increased IsoFs in the CSF of patients

are a new and important finding that may have important clinical implications. IsoFs are altered by oxygen tension, which is an easily modifiable during the clinical care of these patients.

## Notes

### Patients

In two case-controlled studies, 18 comatose patients with severe aSAH and 18 comatose patients with severe TBI were recruited and matched for age and gender with healthy controls. Controls were adults undergoing subarachnoid anesthesia for elective lower limb surgery. The age difference between aSAH and TBI patients necessitated recruitment of two separate control groups matched for age with the patients. The studies were approved by the human ethics committee of Royal Perth Hospital. Informed written consent was obtained from controls and next-of-kin provided consent for the comatose patients.

### CSF sampling

CSF samples were collected from patients within 24 h of the injury from an external ventricular drain inserted, to permit monitoring of intracranial pressures and drainage of CSF. Samples of CSF from control patients were obtained from the subarachnoid space using a spinal needle. CSF was collected into EDTA, reduced glutathione, and butylated hydroxytoluene to prevent *ex vivo* oxidation. Samples were centrifuged at 4°C and stored at -80°C until analysis.

### Measurement of CSF IsoFs, F<sub>4</sub>-NeuroPs, and F<sub>2</sub>-IsoPs

IsoFs, F<sub>4</sub>-NeuroPs, and F<sub>2</sub>-IsoPs were measured using a modification of our previously reported method (9, 10, 13). Briefly, samples were spiked with 5 ng internal standard 15-F<sub>2t</sub>-IsoP-d<sub>4</sub> (8-iso-PGF<sub>2α</sub>-d<sub>4</sub>) purchased from Cayman Chemicals (Ann Arbor, MI), then hydrolyzed with 1 M potassium hydroxide in methanol, acidified, and applied to pre-washed Certify II cartridges (Varian, Lake Forrest, CA). After washing with methanol/water (1:1) and hexane/ethyl acetate (75:25), the metabolites were eluted with ethyl acetate/methanol (90:10) and dried under vacuum. Samples were derivatized using pentafluorobenzylbromide and *N,N*-diisopropylethylamine (Sigma Chemicals, St. Louis, MO), dried under nitrogen, and then treated with the silylating agent *N,O*-bis-(trimethylsilyl)trifluoroacetamide with 1% trimethylchlorosilane (Pierce Chemicals, Rockford, IL). IsoFs, F<sub>2</sub>-IsoPs, and F<sub>4</sub>-NeuroPs were quantitated by gas chromatography-mass spectrometry using electron capture negative ionization and selected ion monitoring. Ions monitored were *m/z* 569, 573, 585, and 593 for F<sub>2</sub>-IsoP, 15 F<sub>2t</sub>-IsoP-d<sub>4</sub>, IsoFs, and F<sub>4</sub>-NeuroPs, respectively. IsoFs (6) and 4(RS)-F<sub>4t</sub>-NeuroP (4, 12) were synthesized in our laboratory as previously described.

### Statistical analysis

Analyses used the STATA (version 11) statistical package (STATA Corp, College Station, TX). CSF IsoFs, F<sub>2</sub>-IsoPs, and F<sub>4</sub>-NeuroPs were transformed using the natural log before analysis. Differences in CSF IsoFs, F<sub>2</sub>-IsoPs, and F<sub>4</sub>-NeuroPs between aSAH and controls, and TBI and controls, were analyzed using a general linear model (GLM) with bootstrap

estimation of the standard error to accommodate the matched clusters. Differences in CSF IsoF, F<sub>2</sub>-IsoP, and F<sub>4</sub>-NeuroPs between aSAH and TBI patients were examined using GLM adjusting for age and gender. A *p*-value less than 0.05 was regarded as statistically significant. A power analysis indicated that the sample size of the study would have power in excess of 80% to detect an effect size of 0.5.

## References

1. Asaeda M, Sakamoto M, Kurosaki M, Tabuchi S, Kamitani H, Yokota M, and Watanabe T. A non-enzymatic derived arachidonyl peroxide, 8-iso-prostaglandin F<sub>2</sub> alpha, in cerebrospinal fluid of patients with aneurysmal subarachnoid hemorrhage participates in the pathogenesis of delayed cerebral vasospasm. *Neurosci Lett* 373: 222–225, 2005.
2. Barden A, Mas E, Henry P, Durand T, Galano JM, Roberts LJ, Croft KD, and Mori TA. The effects of oxidation products of arachidonic acid and n3 fatty acids on vascular and platelet function. *Free Radic Res* 45: 469–476, 2011.
3. Bayir H, Kagan VE, Tyurina YY, Tyurin V, Ruppel RA, Adelson PD, Graham SH, Janesko K, Clark RS, and Kochanek PM. Assessment of antioxidant reserves and oxidative stress in cerebrospinal fluid after severe traumatic brain injury in infants and children. *Pediatr Res* 51: 571–578, 2002.
4. Durand T, Guy A, Vidal JP, Viala J, and Rossi JC. Total synthesis of 4(RS)-F<sub>4t</sub>-isoprostane methyl ester. *Tetrahedron Lett* 41: 3859–3862, 2000.
5. Fessel JP and Jackson Roberts L. Isofurans: novel products of lipid peroxidation that define the occurrence of oxidant injury in settings of elevated oxygen tension. *Antioxid Redox Signal* 7: 202–209, 2005.
6. Fessel JP, Porter NA, Moore KP, Sheller JR, and Roberts LJ, 2nd. Discovery of lipid peroxidation products formed *in vivo* with a substituted tetrahydrofuran ring (isofurans) that are favored by increased oxygen tension. *Proc Natl Acad Sci U S A* 99: 16713–16718, 2002.
7. Hsieh YP, Lin CL, Shiue AL, Yin H, Morrow JD, Hsu JC, Hsieh TC, Wei HJ, and Yen HC. Correlation of F<sub>4</sub>-neuroprostanes levels in cerebrospinal fluid with outcome of aneurysmal subarachnoid hemorrhage in humans. *Free Radic Biol Med* 47: 814–824, 2009.
8. Lin CL, Hsu YT, Lin TK, Morrow JD, Hsu JC, Hsu YH, Hsieh TC, Tsay PK, and Yen HC. Increased levels of F<sub>2</sub>-isoprostanes following aneurysmal subarachnoid hemorrhage in humans. *Free Radic Biol Med* 40: 1466–1473, 2006.
9. Mas E, Barden AE, Corcoran TB, Phillips M, Roberts LJ 2nd, and Mori TA. Effects of spinal or general anesthesia on F(2)-isoprostanes and isofurans during ischemia/reperfusion of the leg in patients undergoing knee replacement surgery. *Free Radic Biol Med* 50: 1171–1176, 2011.
10. Mori TA, Croft KD, Puddey IB, and Beilin LJ. An improved method for the measurement of urinary and plasma F<sub>2</sub>-isoprostanes using gas chromatography-mass spectrometry. *Anal Biochem* 268: 117–125, 1999.
11. Mueed I, Tazzeo T, Liu C, Pertens E, Zhang Y, Cybulski I, Semelhago L, Noora J, Lamy A, Teoh K, Chu V, and Janssen LJ. Isoprostanes constrict human radial artery by stimulation of thromboxane receptors, Ca<sup>2+</sup> release, and RhoA activation. *J Thorac Cardiovasc Surg* 135: 131–138, 2008.
12. Oger C, Bultel-Ponce V, Guy A, Balas L, Rossi JC, Durand T, and Galano JM. The handy use of Brown's P<sub>2</sub>-Ni catalyst for a skipped diyne deuteration: application to the synthesis of a

- [D4]-labeled F4t-neuroprostane. *Chemistry* 16: 13976–13980, 2010.
13. Proudfoot J, Barden A, Mori TA, Burke V, Croft KD, Beilin LJ, and Puddey IB. Measurement of urinary F(2)-isoprostanes as markers of *in vivo* lipid peroxidation—a comparison of enzyme immunoassay with gas chromatography/mass spectrometry. *Anal Biochem* 272: 209–215, 1999.
  14. Roberts LJ and Fessel, JP. The biochemistry of the isoprostane, neuroprostane, and isofuran pathways of lipid peroxidation. *Chem Physics Lipids* 128: 173–186, 2004.
  15. Seifman MA, Adamides AA, Nguyen PN, Vallance SA, Cooper DJ, Kossmann T, Rosenfeld JV, and Morganti-Kossmann MC. Endogenous melatonin increases in cerebrospinal fluid of patients after severe traumatic brain injury and correlates with oxidative stress and metabolic disarray. *J Cereb Blood Flow Metab* 28: 684–696, 2008.
  16. Varma S, Janesko KL, Wisniewski SR, Bayir H, Adelson PD, Thomas NJ, and Kochanek PM. F2-isoprostane and neuron-specific enolase in cerebrospinal fluid after severe traumatic brain injury in infants and children. *J Neurotrauma* 20: 781–786, 2003.
  17. Wagner AK, Bayir H, Ren D, Puccio A, Zafonte RD, and Kochanek PM. Relationships between cerebrospinal fluid markers of excitotoxicity, ischemia, and oxidative damage after severe TBI: the impact of gender, age, and hypothermia. *J Neurotrauma* 21: 125–136, 2004.
